# Supplementary material
Source: MDPI journal article supplement (https://www.mdpi.com/2073-445X/10/11/1109)
Supplement: s1 [file s1]

**Table S1.** Floristic composition of tree species at different altitude and aspects.

| Sr.<br>No. | Tree species                    | Altitudinal ranges (m asl) |          |          |          |                      |          |          |          |                      |          |          |          | Total |
|------------|---------------------------------|----------------------------|----------|----------|----------|----------------------|----------|----------|----------|----------------------|----------|----------|----------|-------|
|            |                                 | AR <sub>1</sub>            |          |          |          | AR <sub>2</sub>      |          |          |          | AR <sub>3</sub>      |          |          |          |       |
|            |                                 | (1000–1300 m a.s.l.)       |          |          |          | (1300–1600 m a.s.l.) |          |          |          | (1600–1900 m a.s.l.) |          |          |          |       |
|            |                                 | E                          | W        | N        | S        | E                    | W        | N        | S        | E                    | W        | N        | S        |       |
| 1          | <i>Pinus roxburghii</i>         | +                          | +        | +        | +        | +                    | +        | +        | +        | +                    | +        | +        | +        | 12    |
| 2          | <i>Cedrus deodara</i>           | –                          | –        | +        | –        | –                    | –        | –        | –        | –                    | –        | +        | –        | 2     |
| 3          | <i>Quercus leucotrichophora</i> | –                          | –        | +        | –        | +                    | –        | +        | –        | –                    | +        | +        | –        | 5     |
| 4          | <i>Acacia catechu</i>           | –                          | –        | –        | +        | –                    | –        | –        | +        | –                    | –        | –        | –        | 2     |
| 5          | <i>Myric aesculenta</i>         | +                          | –        | –        | –        | –                    | +        | –        | –        | –                    | –        | –        | –        | 2     |
| 6          | <i>Bauhinia variegata</i>       | –                          | –        | –        | –        | –                    | –        | –        | +        | –                    | –        | –        | –        | 1     |
| 7          | <i>Albizia chinensis</i>        | +                          | –        | –        | –        | +                    | –        | –        | –        | –                    | –        | –        | –        | 2     |
| 8          | <i>Acer oblungum</i>            | –                          | –        | +        | –        | –                    | –        | –        | –        | –                    | –        | –        | –        | 1     |
| 9          | <i>Erythrina indica</i>         | –                          | –        | –        | +        | –                    | –        | +        | +        | –                    | –        | –        | –        | 3     |
| 10         | <i>Bombax ceiba</i>             | –                          | –        | –        | –        | –                    | –        | –        | +        | –                    | –        | –        | –        | 1     |
| 11         | <i>Butea monosperma</i>         | –                          | –        | –        | –        | –                    | –        | –        | +        | –                    | –        | –        | –        | 1     |
|            | <b>Total</b>                    | <b>3</b>                   | <b>1</b> | <b>4</b> | <b>3</b> | <b>3</b>             | <b>2</b> | <b>3</b> | <b>6</b> | <b>1</b>             | <b>2</b> | <b>3</b> | <b>1</b> |       |

E (eastern aspect), W (western aspect), N (northern aspect), S (southern aspect), + (species present), – (species absent); altitudinal ranges of study area: AR<sub>1</sub> (1000–1300 m above mean sea level (m a.s.l.)), AR<sub>2</sub> (1300–1600 m a.s.l.) and AR<sub>3</sub> (1600–1900 m a.s.l.)

**Table S2.** Floristic compositions of shrub species at different altitudes and aspects.

| Sr.<br>No<br>. | Shrub species                     | Altitudinal ranges (AR)                 |   |   |    |                                         |   |   |   |                                         |   |   |   | Total |
|----------------|-----------------------------------|-----------------------------------------|---|---|----|-----------------------------------------|---|---|---|-----------------------------------------|---|---|---|-------|
|                |                                   | AR <sub>1</sub> (1000–1300 m<br>a.s.l.) |   |   |    | AR <sub>2</sub> (1300–1600 m<br>a.s.l.) |   |   |   | AR <sub>3</sub> (1600–1900 m<br>a.s.l.) |   |   |   |       |
|                |                                   | E                                       | W | N | S  | E                                       | W | N | S | E                                       | W | N | S |       |
| 1              | <i>Lantana camara</i>             | +                                       | + | – | +  | –                                       | – | – | – | –                                       | – | + | + | 5     |
| 2              | <i>Berberis aristata</i>          | –                                       | + | + | +  | +                                       | – | + | + | –                                       | – | + | + | 8     |
| 3              | <i>Carissa carandas</i>           | +                                       | + | – | –  | –                                       | + | – | – | +                                       | – | + | + | 6     |
| 4              | <i>Coriaria nepalensis</i>        | –                                       | – | + | –  | +                                       | – | + | – | +                                       | + | – | – | 5     |
| 5              | <i>Myrsine africana</i>           | –                                       | – | + | –  | +                                       | – | – | + | –                                       | + | – | + | 5     |
| 6              | <i>Indigofera cassioides</i>      | –                                       | + | – | –  | –                                       | + | – | – | –                                       | – | + | + | 4     |
| 7              | <i>Sarcococca saligna</i>         | –                                       | – | + | –  | –                                       | – | – | – | –                                       | – | – | – | 1     |
| 8              | <i>Daphne cannabina</i>           | –                                       | – | + | –  | +                                       | – | – | + | –                                       | – | – | – | 3     |
| 9              | <i>Woodfordia fruticosa</i>       | –                                       | – | – | +  | –                                       | – | + | – | –                                       | + | – | – | 3     |
| 10             | <i>Rubus ellipticus</i>           | –                                       | – | + | –  | +                                       | – | + | – | –                                       | – | – | – | 3     |
| 11             | <i>Osyris arborea</i>             | –                                       | – | – | +  | –                                       | + | + | – | –                                       | – | – | – | 3     |
| 12             | <i>Randia tetrasperma</i>         | +                                       | – | – | +  | –                                       | – | – | + | –                                       | – | – | – | 3     |
| 13             | <i>Adhatoda vasica</i>            | +                                       | – | – | +  | –                                       | – | – | – | +                                       | – | – | – | 3     |
| 14             | <i>Cassia floribunda</i>          | –                                       | – | – | –  | –                                       | – | + | – | –                                       | – | – | – | 1     |
| 15             | <i>Woodfordia floribunda</i>      | +                                       | + | – | –  | –                                       | – | + | – | –                                       | – | – | – | 3     |
| 16             | <i>Artemisia vulgaris</i>         | –                                       | – | – | +  | –                                       | + | – | – | –                                       | – | – | – | 2     |
| 17             | <i>Prinsepia utilis</i>           | –                                       | – | – | +  | –                                       | + | – | – | –                                       | + | – | – | 3     |
| 18             | <i>Rabdosia rubescens</i>         | +                                       | + | – | +  | –                                       | + | – | + | –                                       | – | – | – | 5     |
| 19             | <i>Boenninghausenia albiflora</i> | –                                       | – | + | –  | +                                       | – | – | + | +                                       | – | – | – | 4     |
| 20             | <i>Hypericum oblongifolium</i>    | –                                       | – | – | –  | –                                       | – | – | + | –                                       | – | – | – | 1     |
| 21             | <i>Randia tetrasperma</i>         | +                                       | – | – | +  | –                                       | – | – | – | –                                       | + | – | – | 3     |
| Total          |                                   | 7                                       | 6 | 7 | 10 | 6                                       | 6 | 7 | 7 | 4                                       | 5 | 4 | 5 |       |

E (eastern aspect), W (western aspect), N (northern aspect), S (southern aspect), + (species present), – (species absent); altitudinal ranges of study area: AR<sub>1</sub> (1000–1300 m above mean sea level (m a.s.l.)), AR<sub>2</sub> (1300–1600 m a.s.l.) and AR<sub>3</sub> (1600–1900 m a.s.l.)

**Table S3.** Distribution of vegetation communities and forest types with aspects and altitudinal ranges.

|                               |                                      | Vegetation community/Forest type |                                                                                           |                            |                                                                                           |                           |                                                                                                |                                                                           |                                                                                      |
|-------------------------------|--------------------------------------|----------------------------------|-------------------------------------------------------------------------------------------|----------------------------|-------------------------------------------------------------------------------------------|---------------------------|------------------------------------------------------------------------------------------------|---------------------------------------------------------------------------|--------------------------------------------------------------------------------------|
|                               |                                      | Eastern (E)                      |                                                                                           | Western (W)                |                                                                                           | Northern (N)              |                                                                                                | Southern (S)                                                              |                                                                                      |
|                               |                                      | Vegetation community             | Type*                                                                                     | Vegetation community       | Type*                                                                                     | Vegetation community      | Type*                                                                                          | Vegetation community                                                      | Type*                                                                                |
| Altitudinal ranges (m a.s.l.) | AR <sub>1</sub> (1000-1300 m asl)    | Chir pine community              |                                                                                           | Chir pine community        |                                                                                           | Chir pine-Oak community   |                                                                                                | Chir pine-Khair community                                                 |                                                                                      |
|                               | AR <sub>2</sub> (1300-1600 m a.s.l.) | Chir pine-Oak community          | 9/C1 Himalayan subtropical pine forest; Subtype 9/C1b Upper or Himalayan chir pine forest | Chir pine-Myrica community | 9/C1 Himalayan subtropical pine forest; Subtype 9/C1b Upper or Himalayan chir pine forest | Chir pine-Oak community   | 12C1 Lower western Himalaya temperate; Subtype 12C1a Ban oak forest (Quercus leucotrichophora) | Chir pine, Khair and miscellaneous mixed broad leave vegetation community | 9/C1 Himalayan subtropical pine forest Subtype 9/C1a Lower shiwalik Chir pine forest |
|                               | AR <sub>3</sub> (1600-1900 m a.s.l)  | Chir pine community              |                                                                                           | Chir pine community        |                                                                                           | Chir pine - Oak community |                                                                                                | Chir-pine community                                                       |                                                                                      |

\*= as per the Champion and Seth [57] classification.

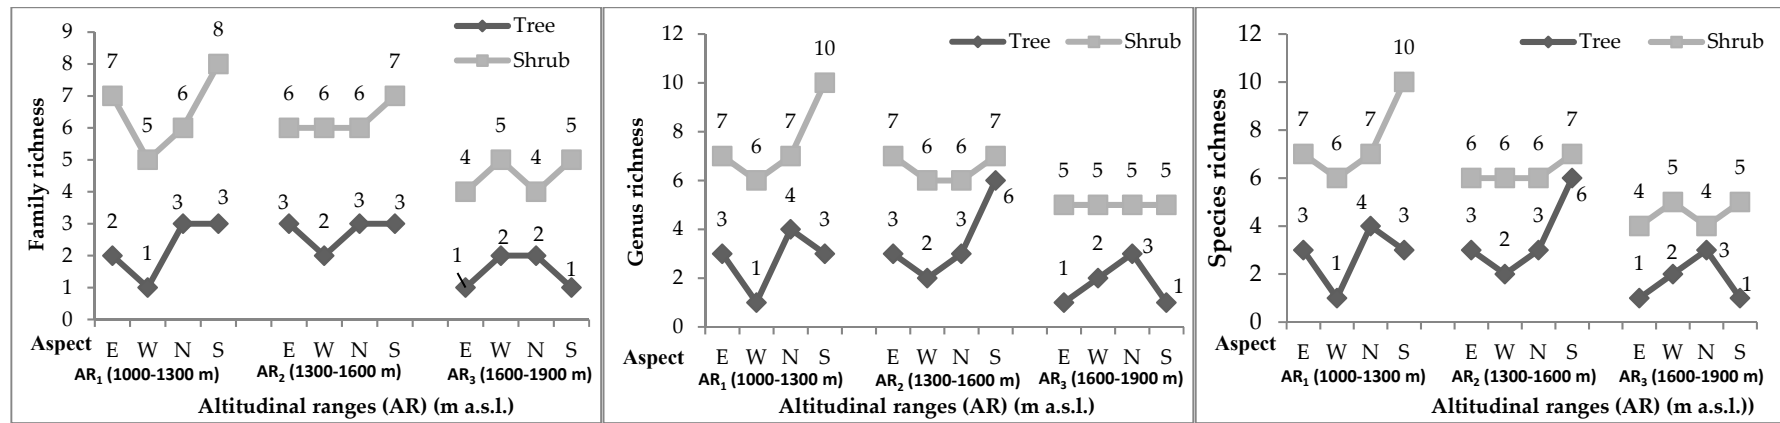

**Figure S1.** The total richness of family, genus, and species of trees and shrubs to aspects and altitudinal ranges on the mid-hills of Himachal Pradesh; where E (eastern aspect), W (western aspect), N (northern aspect), S (southern aspect).
